# Supplementary material for: Vitamin D constrains inflammation by modulating the expression of key genes on Chr17q12-21.1
Source: eLife. 2024 Apr 3;12:RP89270. doi: 10.7554/eLife.89270 (PMC10990493; doi:10.7554/eLife.89270)
Supplement: Supplementary file 1. [file elife-89270-supp1.xlsx]

## Sheet: Sheet1
Antibody	clone	Vendor	catalog #
Aiolos PE	8B2	Biolegend	653204
CD122 (IL2Rβ) APC	5H4	Biolegend	5H4
CD19 PE-Cy7	6D5	Biolegend	115520
CD4 FITC	RM4-5	Biolegend	100510
CD4 PerCPeFluor710	RM4-5	eBioscience	46-0042-82
CD44 FITC	IM7	Biolegend	103006
CD45 BV421	104	Biolegend	109832
CD62L PE	MEL-14	Biolegend	104408
CD8a APC-Cy7	53-6.7	Biolegend	100714
Foxp3 PE	FJK-16s	Invitrogen	12-5773-82
Gata3 PE	16E10A23	Biolegend	653804
IFNg FITC	XMG1.2	Biolegend	505806
IL-10 Pacific Blue	JES5-16E3	Biolegend	505020
IL-13 eFluor660	eBio13A	eBioscience	50-7133-82
IL-13 PE	eBio13A	molecular probes	A18492
IL17A PE-Cy7	TC11-18H10.1	Biolegend	506922
IL-2 PE-TexasRed	JES6-5H4	Biolegend	503840
monoclonal b-actin-Peroxidase	AC-15	Sigma-Aldrich	A3854
Phospho-BTK/ITK	M4G3LN	eBioscience	12-9015-42
Tbet PE	4B10	Biolegend	644809
VDR	D2K6W	Cell Signaling Technology	12550S
VDR AlexaFluor647	D2K6W	Cell Signaling Technology	custom order
