# Supplementary material for: Vitamin D constrains inflammation by modulating the expression of key genes on Chr17q12-21.1
Source: eLife. 2024 Apr 3;12:RP89270. doi: 10.7554/eLife.89270 (PMC10990493; doi:10.7554/eLife.89270)
Supplement: Supplementary file 2. [file elife-89270-supp2.xlsx]

## Sheet: Sheet1
Reagent	Vendor	catalog #
anti-mouse CD28 (37.51)	BD Biosciences	553294
anti-mouse CD3e (145-2C11)	BD Biosciences	553057
b-mercaptoethanol	gibco	21985-032
calcitriol	Sigma-Aldrich	D1530
collagenase D	Roche	11088866001
Kwik-Diff soultion	Shandon	9990700
DMSO	Sigma-Aldrich	D2438
ProLong gold Anitfade Mountant with DAPI	ThermoFisher Scietific	P36935
rat anti-mouse anti-IFNg	BD Biosciences	554430
Anti-Mouse CD16/CD32 (Mouse BD Fc Block	BD Biosciences	553141
hamster anti-mouse anti-IL-4 (11B11)	BD Biosciences	554433
L-Glutamin	Sigma- Aldrich	G7513
LS columns	Miltenyi	130-042-401
microRNeasy	Qiagen	74004
naive CD4+ T cell isolation kit	Miltenyi	130-104-453
MEM non-essential amino acid solution (100x)	Sigma- Aldrich	M7145
Penicillin/Streptomycin	Sigma- Aldrich	P4333
Cell stimulation Cocktail (500x) phorbol myristate acetate (PMA)/Ionomycin	Tocris	TNB-4975
phosphate buffered saline	Gibco	14190-144
recombinant human TGFb1	Peprotech	100-21C
recombinant mouse IL-12	Peprotech	210-12
recombinant mouse IL-13	Peprotech	210-13
recombinant mouse IL-2	Peprotech	212-12
recombinant mouse IL-33	Peprotech	210-33
recombinant mouse IL-4	Peprotech	214-14
recombinant mouse IL-6	Peprotech	216-16
recombinant human IL-2	Peprotech	200-02
RPMI1640	Sigma-Aldrich	R8758
STAT3 inhibitor III WP1066	Sigma-Aldrich	573129
STAT5 inhibitor	EMD Millipore	573106
AS1517499 (STAT6 inhibitor)	Millipore-Sigma	SML190
U0126	CellSignaling Technologies	9903S
LY294002	CellSignaling Technologies	9901S
SsoFast Eva Green	Bio-Rad	1725201
10x zink fixative	BD Pharmingen	552658
Tris-Glycine-SDS Running Buffer	Boston Bioproducts	BP-150
Transfer buffer	Boston Bioproducts	BP-190
Tris Buffered Saline with Tween 20	CellSignaling Technologies	9997S
