# Supplementary material for: Vitamin D constrains inflammation by modulating the expression of key genes on Chr17q12-21.1
Source: eLife. 2024 Apr 3;12:RP89270. doi: 10.7554/eLife.89270 (PMC10990493; doi:10.7554/eLife.89270)
Supplement: Supplementary file 3. [file elife-89270-supp3.xlsx]

## Sheet: Sheet1
Gene	species	sequence
Gsdma antisense	mouse	5'-TCA ACC AGC TTC AGT TGC AC-3'
Gsdma sense	mouse	5'-TGC TGT CAA AGG ACG CTA TG-3'
Ikzf3 sense	mouse	5'-TGT CAC CTC TGC AAC TAC GC-3'
Ikzsf3 antisense	mouse	5'-TTC CGC AGA ACT CAC ACT TG-3'
IL-2 antisense	mouse	5'-ATC CTG GGG AGT TTC AGG TT-3'
IL-2 sense	mouse	5'-CCC ACT TCA AGC TCC ACT TC-3'
Ormdl3 antisense	mouse	5'-CTT TGC CTT GGT CTG GAG TC-3'
Ormdl3 sense	mouse	5'-CAC ACG GGT GAT GAA C AG TC-3'
Stat3 antisense	mouse	5'-TCG TGG TAA ACT GGA CAC CA-3'
Stat3 sense	mouse	5'-GAG GAG CTG CAG CAG AAA GT-3'
Stat5a antisense	mouse	5'-GTC AAA CTC GCC ATC TTG GT-3'
Stat5a sense	mouse	5'-TAC ATG GAC CAG GCT CCT TC-3'
Stat5b antisense	mouse	5'-TGG GTG GCC TTA ATG TTC TC-3'
Stat5b sense	mouse	5'-TGT GGA TAC AGG CTC AGC AG-3'
